# Supplementary material for: Superior As(iii) removal performance of hydrous MnOOH nanorods from water
Source: Royal Society of Chemistry journal article supplement (doi:10.1039/c5ra09157h), 2015-01-01
Supplement: c5ra09157h1.pdf [file c5ra09157h1.pdf]

**Superior As(III) Removal Performance of Hydrrous MnOOH Nanorods from Water**

Song Guo<sup>a</sup>, Wuzhu Sun<sup>a</sup>, Weiyi Yang<sup>a</sup>, Qi Li<sup>a,\*</sup>, and Jian Ku Shang<sup>a, b</sup>

*<sup>a</sup>Environment Functional Materials Division*

*Shenyang National Laboratory for Materials Science*

*Institute of Metal Research, Chinese Academy of Sciences, Shenyang 110016, China;*

*<sup>b</sup>Department of Materials Science and Engineering*

*University of Illinois at Urbana-Champaign, Urbana, Illinois 61801, USA.*

\*Corresponding author: E-mail address: [qili@imr.ac.cn](mailto:qili@imr.ac.cn) (Q. Li)

Phone: +86-24-83978028, Fax: +86-24-23971215.

Postal address: 72 Wenhua Road, Shenyang, Liaoning Province, 110016, P. R. China.

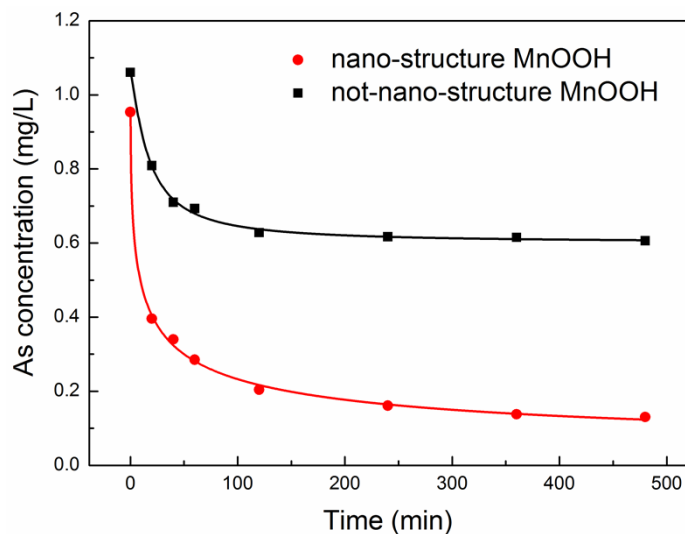

Figure S1. Adsorption kinetics of As(III) on MnOOH nanorods and not-nano-structured MnOOH sample with the initial As(III) concentration  $\sim 1.0$  mg/L and the adsorbent dosage was 0.1 g/L.

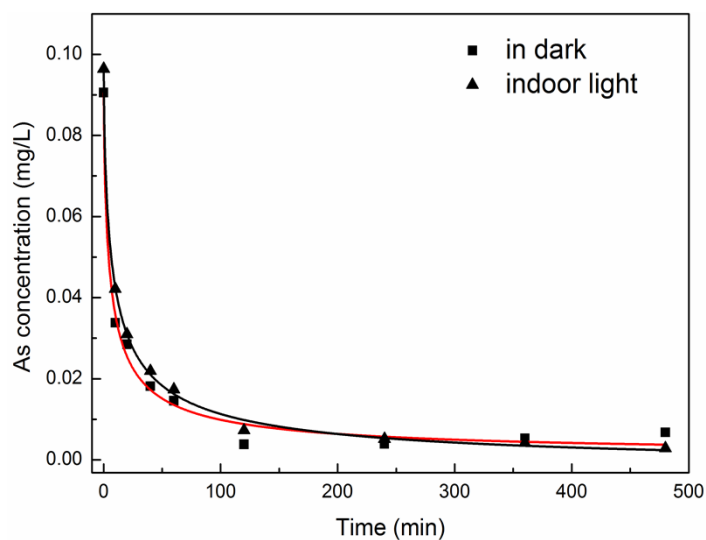

Figure S2. Adsorption kinetics of As(III) on MnOOH nanorods with initial As(III) concentration of  $\sim 0.1$  mg/L in dark and under the indoor light, respectively. No obvious difference was observed between them.

**As(III) Oxidation by Manganite:**

The As(III) oxidation by MnOOH could be expressed as following:<sup>1</sup>

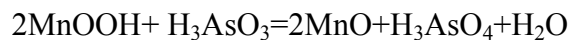

In the adsorption process, part of released  $\text{Mn}^{2+}$  could be adsorbed by MnOOH nanorods which could reduce Mn release into water.<sup>2-4</sup>

**References:**

1. H. W. Nesbitt, G. W. Canning and G. M. Bancroft, *Geochim. Cosmochim. Ac.*, 1998, **62**, 2097-2110.
2. D. W. Oscarson, P. M. Huang and W. K. Liaw, *J. Environ. Qual.*, 1980, **9**, 700-703.
3. D. W. Oscarson, P. M. Huang, W. K. Liaw and U. T. Hammer, *Soil Sci. Soc. Am. J.*, 1983, **47**, 644-648.
4. J. N. Moore, J. R. Walker and T. H. Hayes, *Clay. Clay. Miner.*, 1990, **38**, 549-555.
